# Supplementary material for: Non-invasive biomarkers for identification of vanishing bile duct syndrome among children with acute cholestatic hepatitis
Source: PubMed Central journal article supplement — Transl Pediatr. 2023 Oct 27;12(10):1782–90. doi: 10.21037/tp-23-305 (PMC10644022; doi:10.21037/tp-23-305), 2023-10-27
Supplement: tp-12-10-1782-supplementary.pdf [file tp-12-10-1782-supplementary.pdf]

**Table S1** Implicated agents in 24 patients with vanishing bile duct loss

| Agents                  | Patient       |
|-------------------------|---------------|
| Piperacillin-tazobactam | P6, P9, P11   |
| Azithromycin            | P10, P12, P16 |
| Amoxicillin-clavulanate | P3, P22       |
| Amoxicillin             | P7            |
| Valproate acid          | P2            |
| Chinese herbal medicine | P14, P19, P21 |
